# Supplementary material for: Clustering analysis of large-scale phenotypic data in the model filamentous fungus Neurospora crassa
Source: PubMed Central journal article supplement (PMC7607824; doi:10.1186/s12864-020-07131-7), 2020-11-02
Supplement: 12864_2020_7131_MOESM7_ESM.pdf [file 12864_2020_7131_MOESM7_ESM.pdf]

Additional File 7

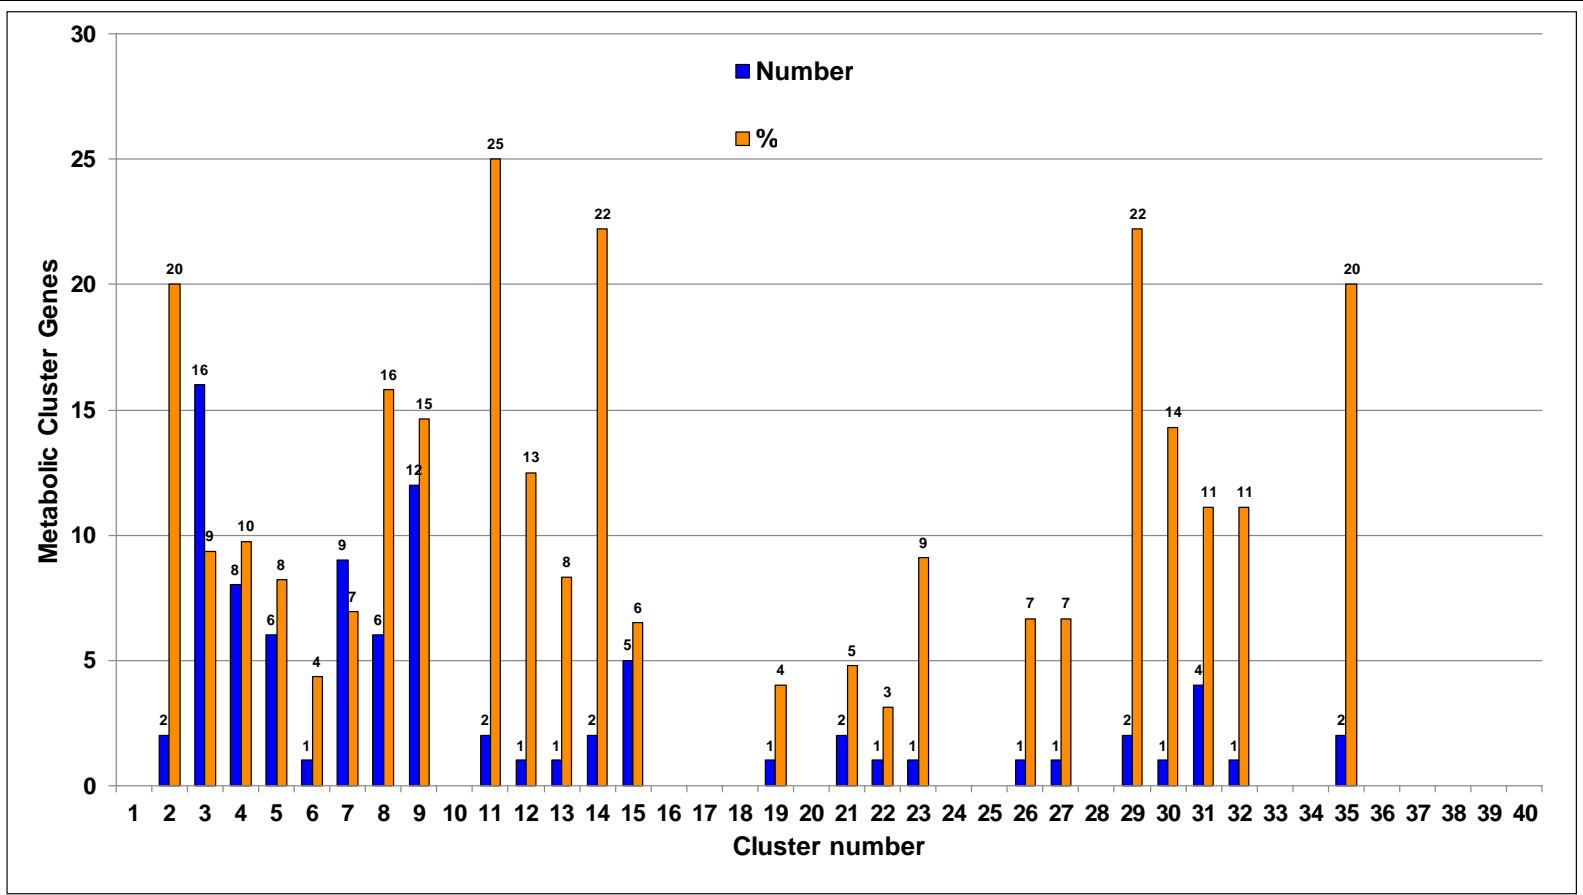

**Distribution of metabolic genes in clusters.** The number of metabolic genes in each cluster, along with the % representation in each cluster is shown (actual numbers on top of bars). The list of metabolic genes is from Dreyfuss et al., 2013.

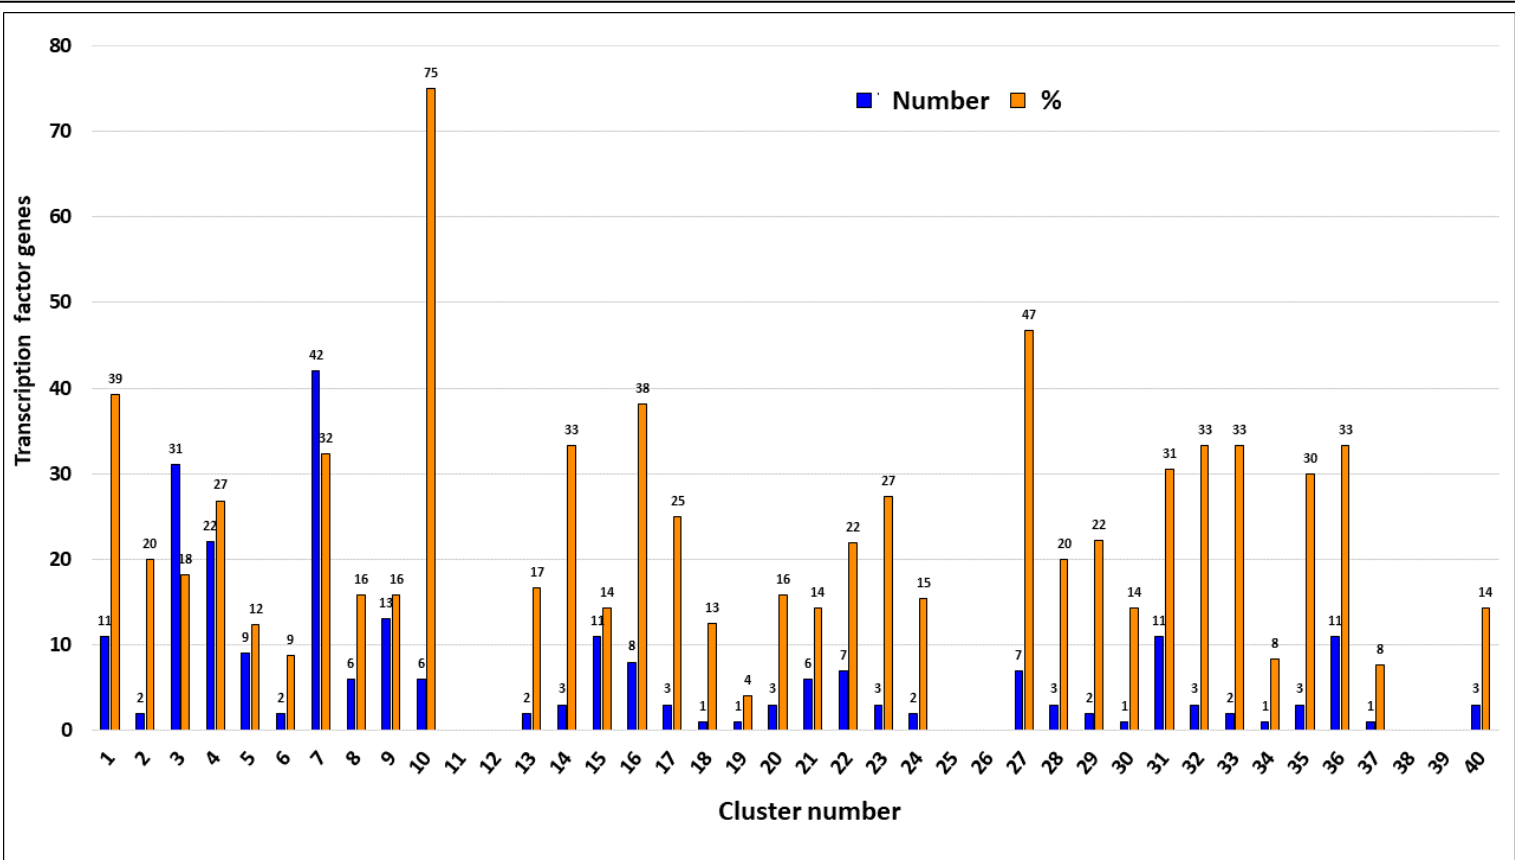

**Distribution of transcription factors in clusters.** The number of genes encoding a transcription factor in each cluster, along with the % representation in each cluster is shown (actual numbers on top of bars). The list of transcription factor genes is from Carrillo et. al., 2015.
