# Supplementary material for: Clustering analysis of large-scale phenotypic data in the model filamentous fungus Neurospora crassa
Source: PubMed Central journal article supplement (PMC7607824; doi:10.1186/s12864-020-07131-7), 2020-11-02
Supplement: 12864_2020_7131_MOESM9_ESM.pdf [file 12864_2020_7131_MOESM9_ESM.pdf]

## Additional File 9

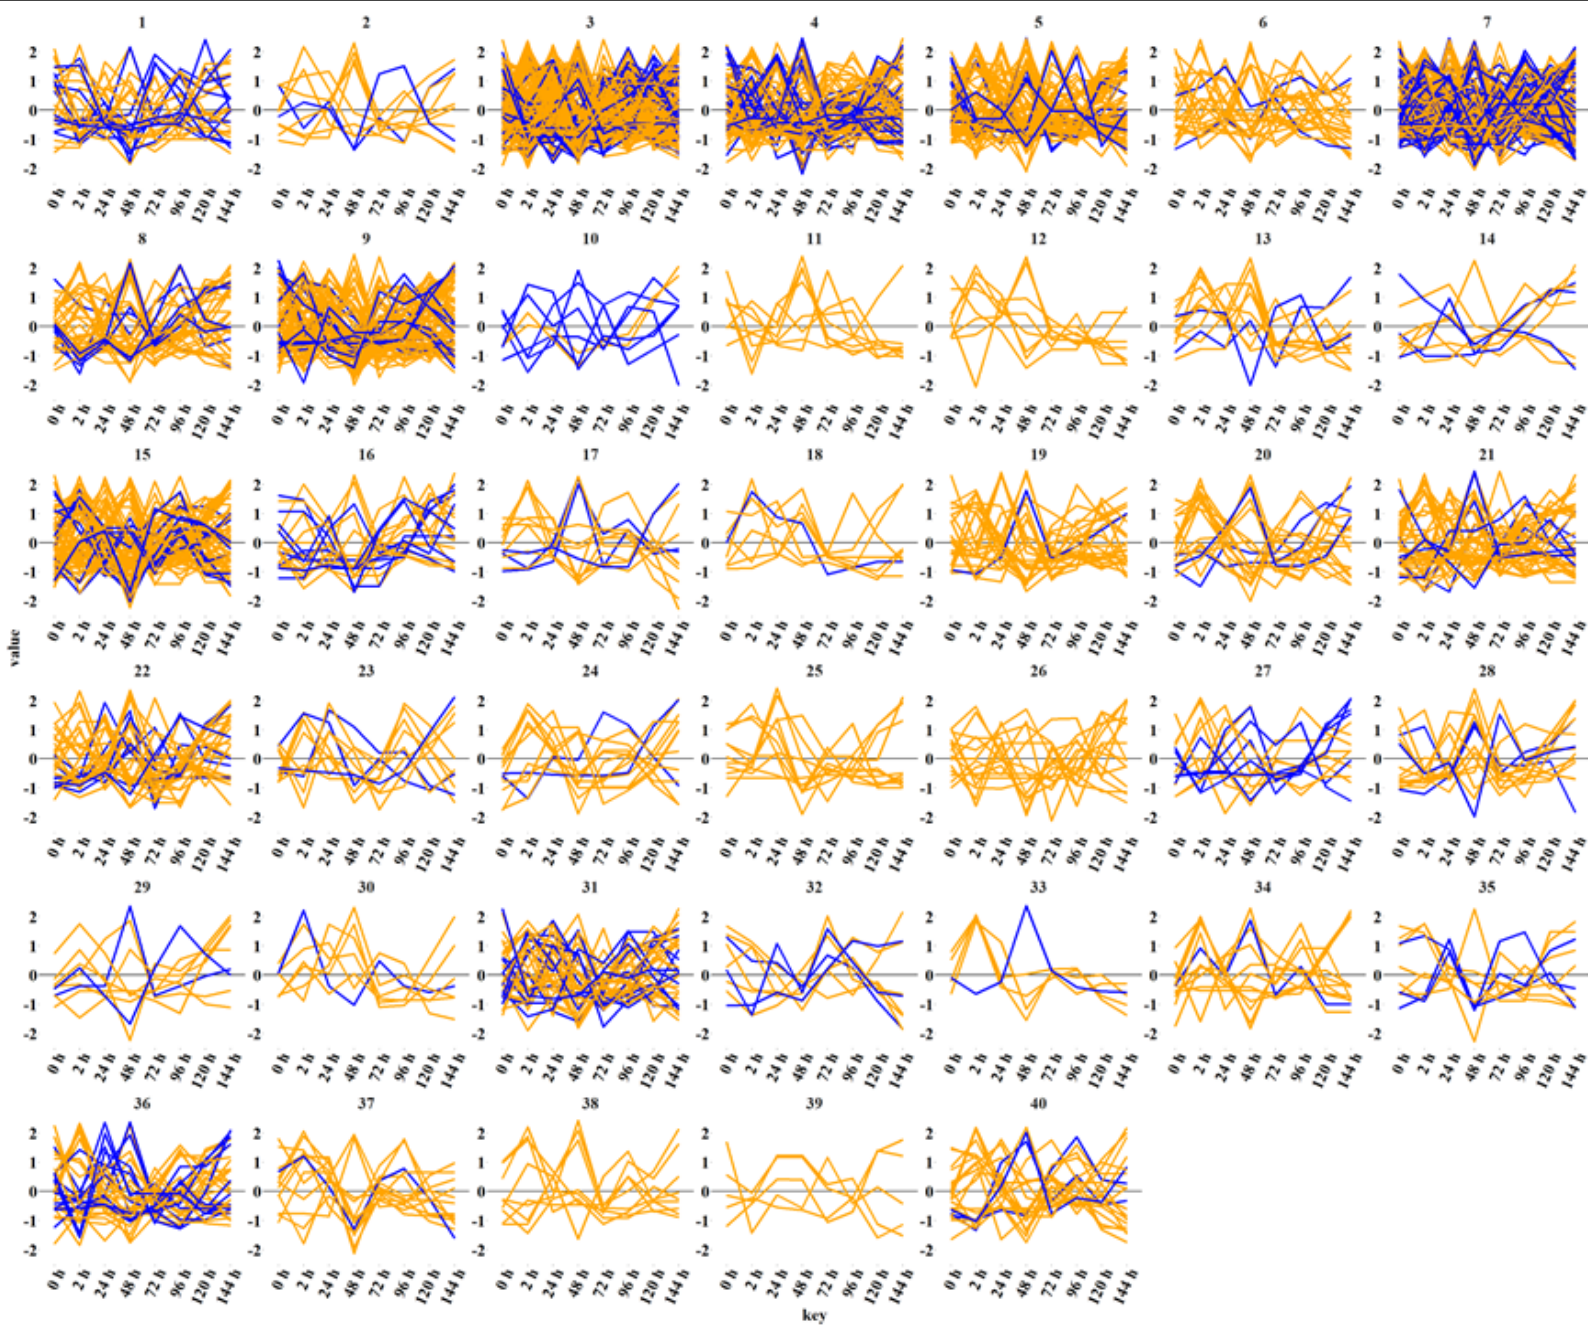

**Expression of cluster genes during a sexual development time course.** RNAseq data were obtained from Wang et al., 2014. The expression value for each gene was standardized to have a mean of 0 and a standard deviation of 2 across the eight time points in the dataset. Each gene is represented as a single line from 0 h to 144 h, with the blue lines representing transcription factors and all other genes as orange.

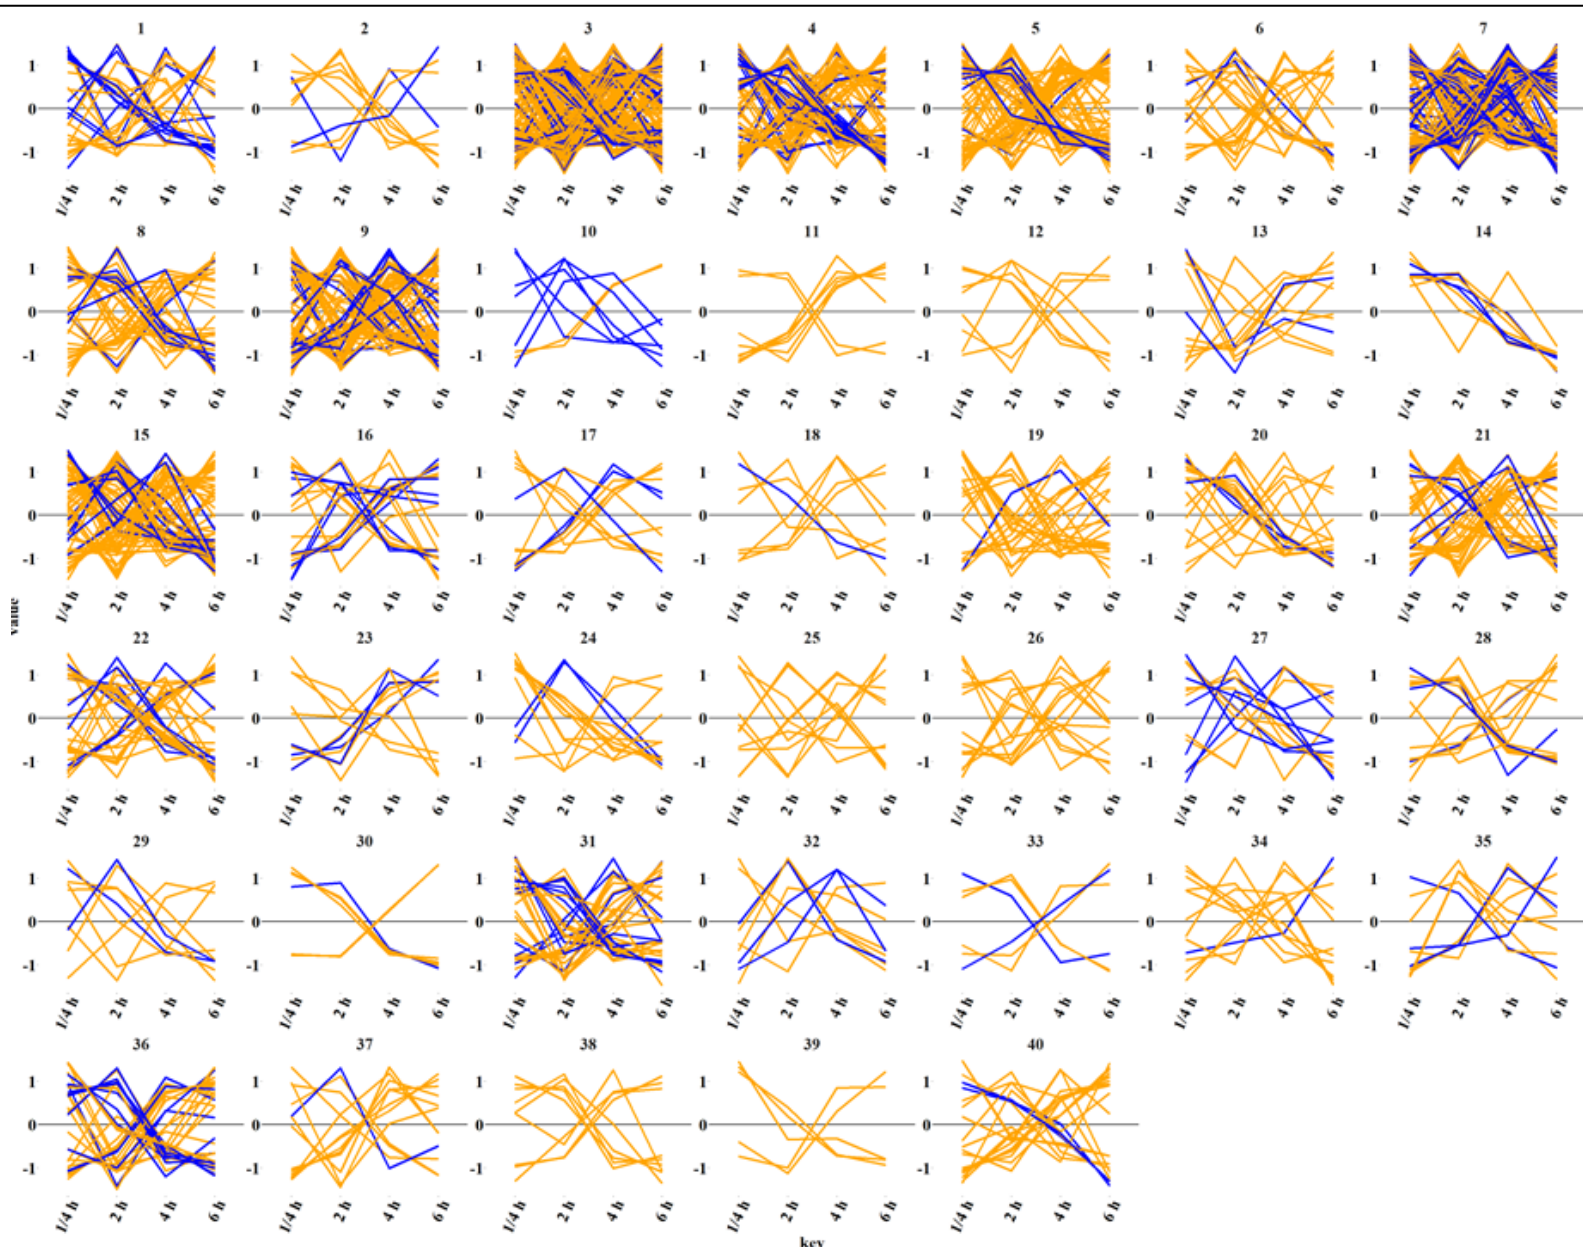

**Supplemental figure 4. Expression of genes during a conidial germination timecourse per cluster.** RNAseq data were obtained from Wang et. al., 2019. The expression value for each gene was standardized to have a mean of 0 and a standard deviation of 2 across the four samples. Each gene is represented as a single line from 0.25 h to 6 h, with the blue lines representing transcription factors and all other genes as orange.

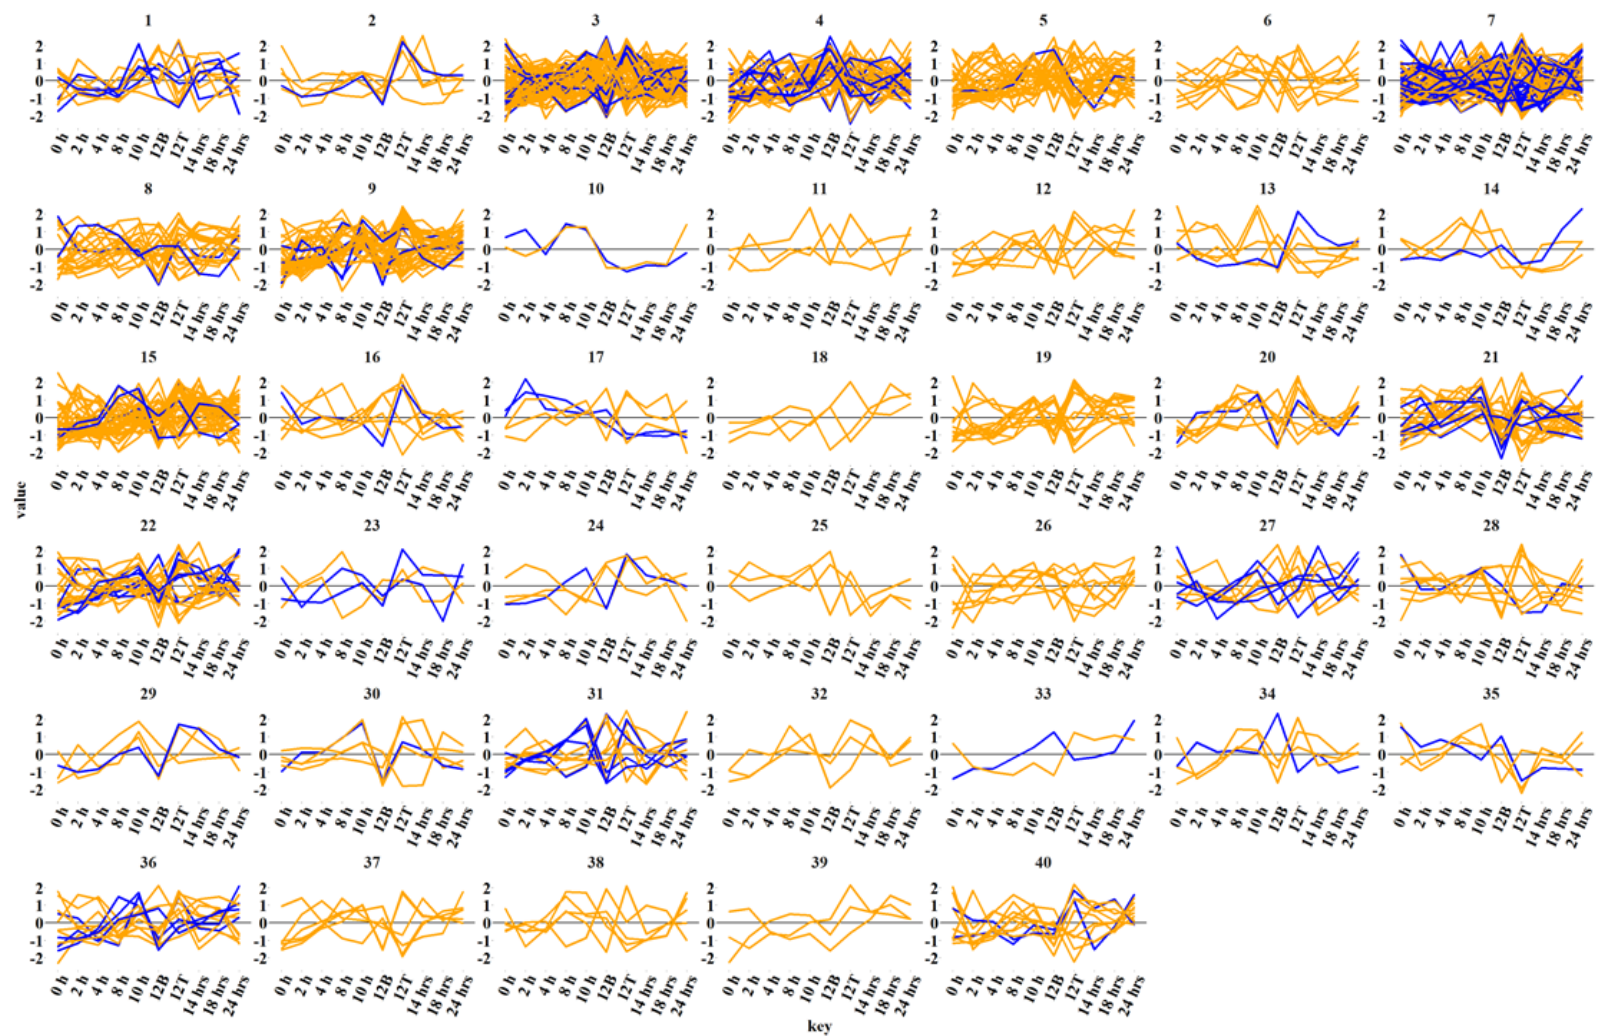

**Expression of genes during a conidiation timecourse per cluster.** Microarray data were obtained from Greenwald et al., 2010. The expression value for each gene was standardized to have a mean of 0 and a standard deviation of 2 across the 10 samples. Each gene is represented as a single line from 0 h to 24 h, with the blue lines representing transcription factors and all other genes as orange.

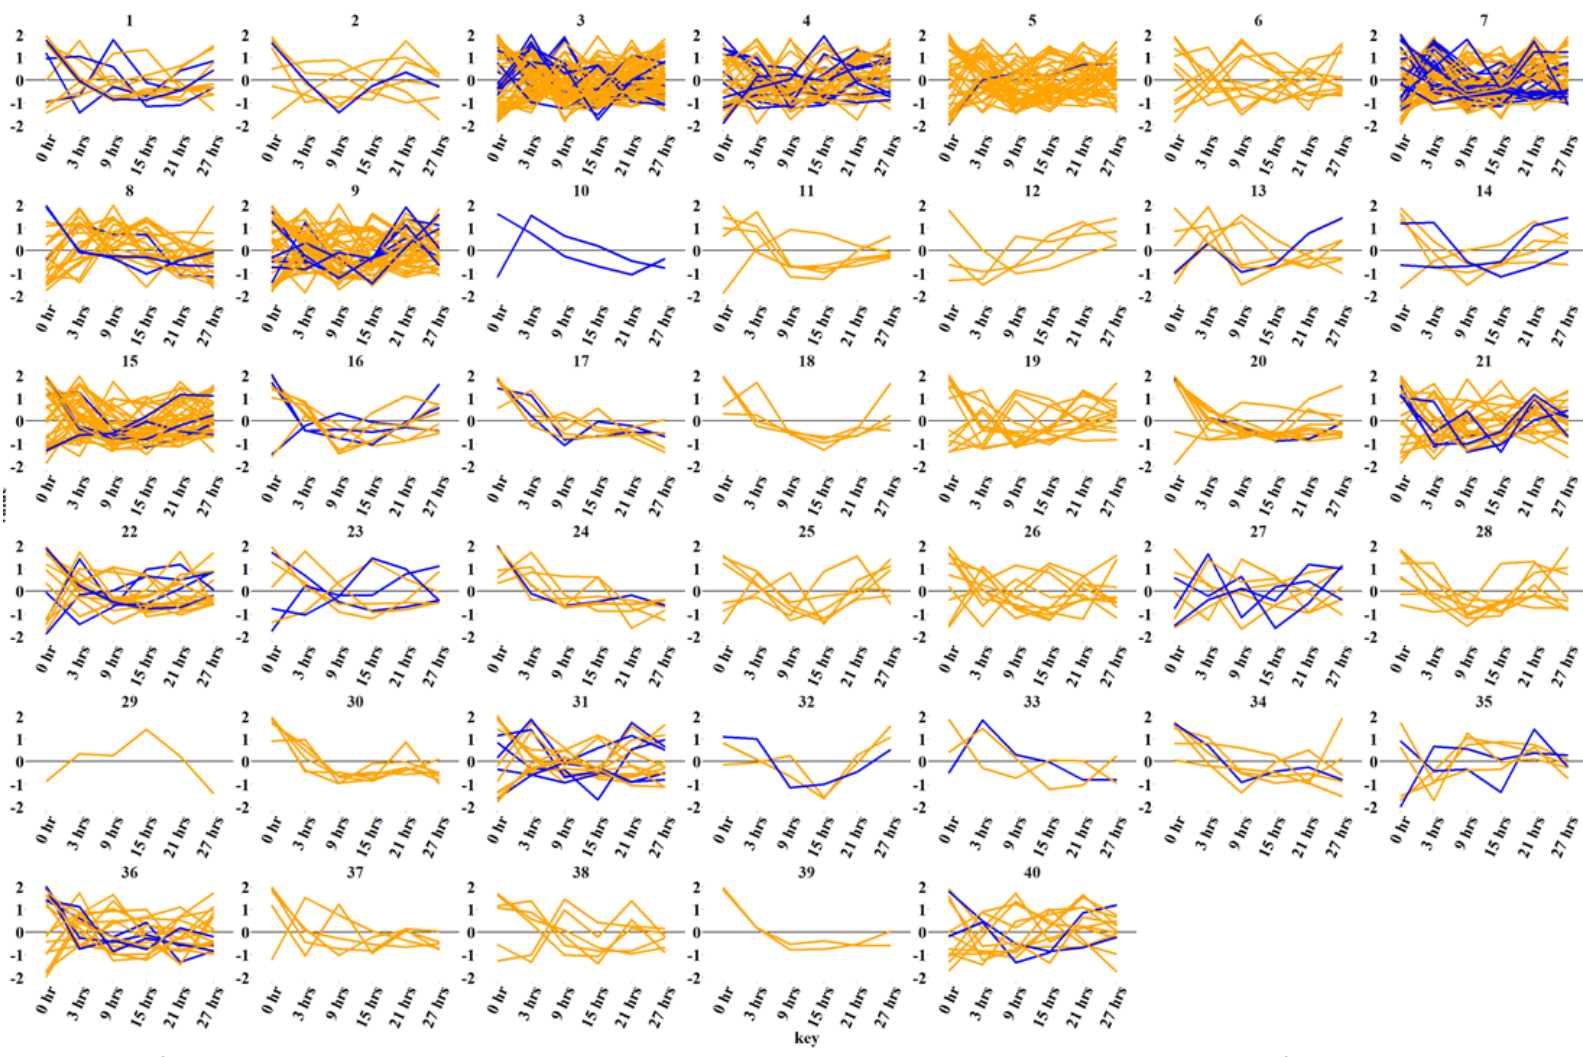

**Expression of genes during colony a development timecourse per cluster.** Microarray data were obtained from Kasuga et al., 2008. The expression value for each gene was standardized to have a mean of 0 and a standard deviation of 2 across the six samples. Each gene is represented as a single line from 0 h to 27 h, with the blue lines representing transcription factors and all other genes as orange.

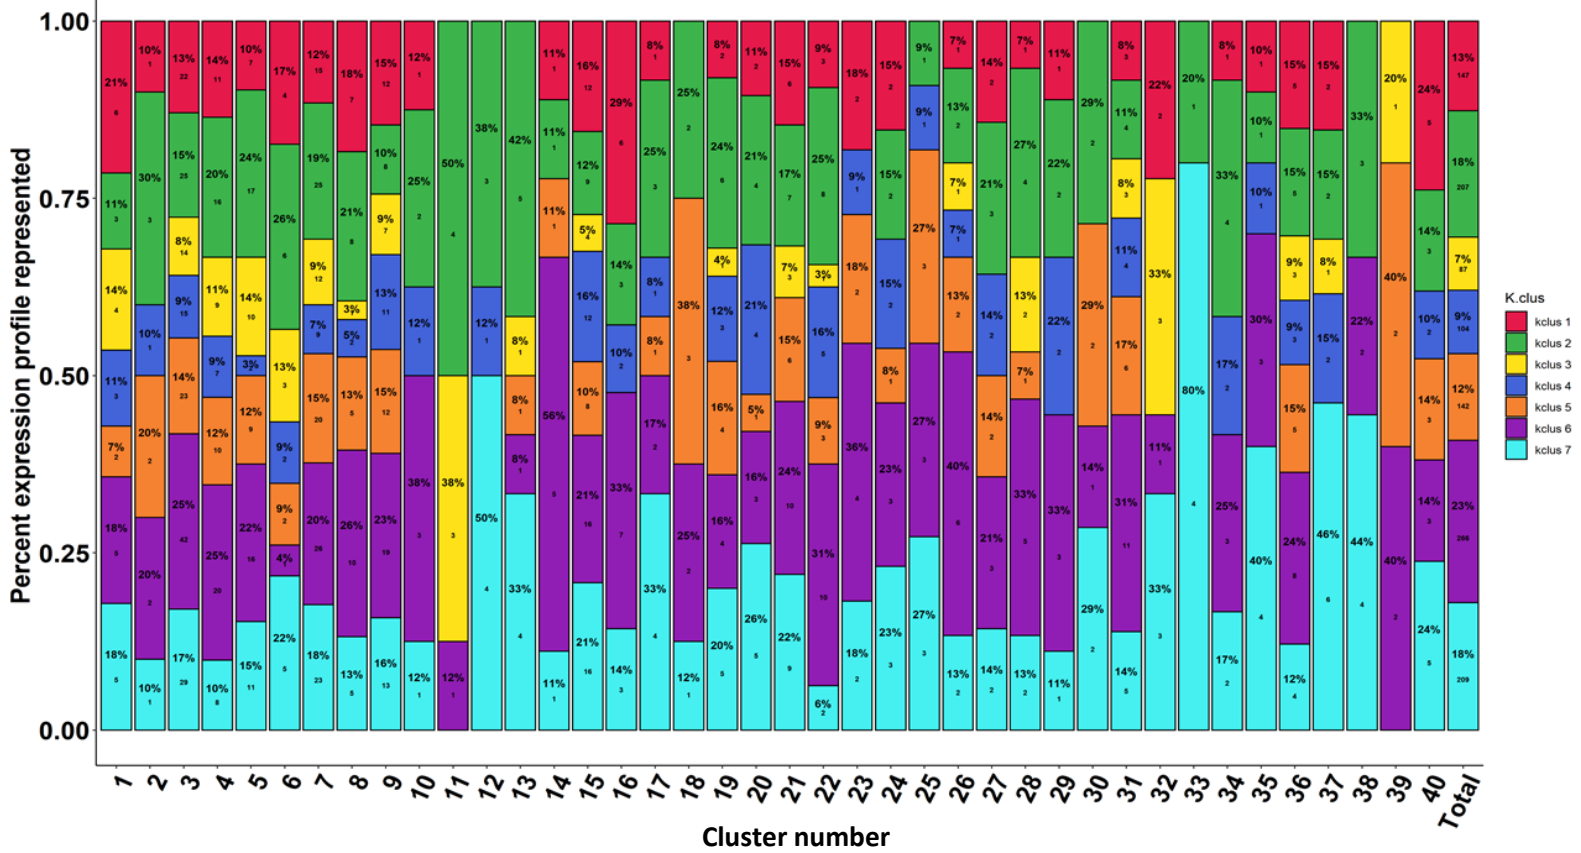

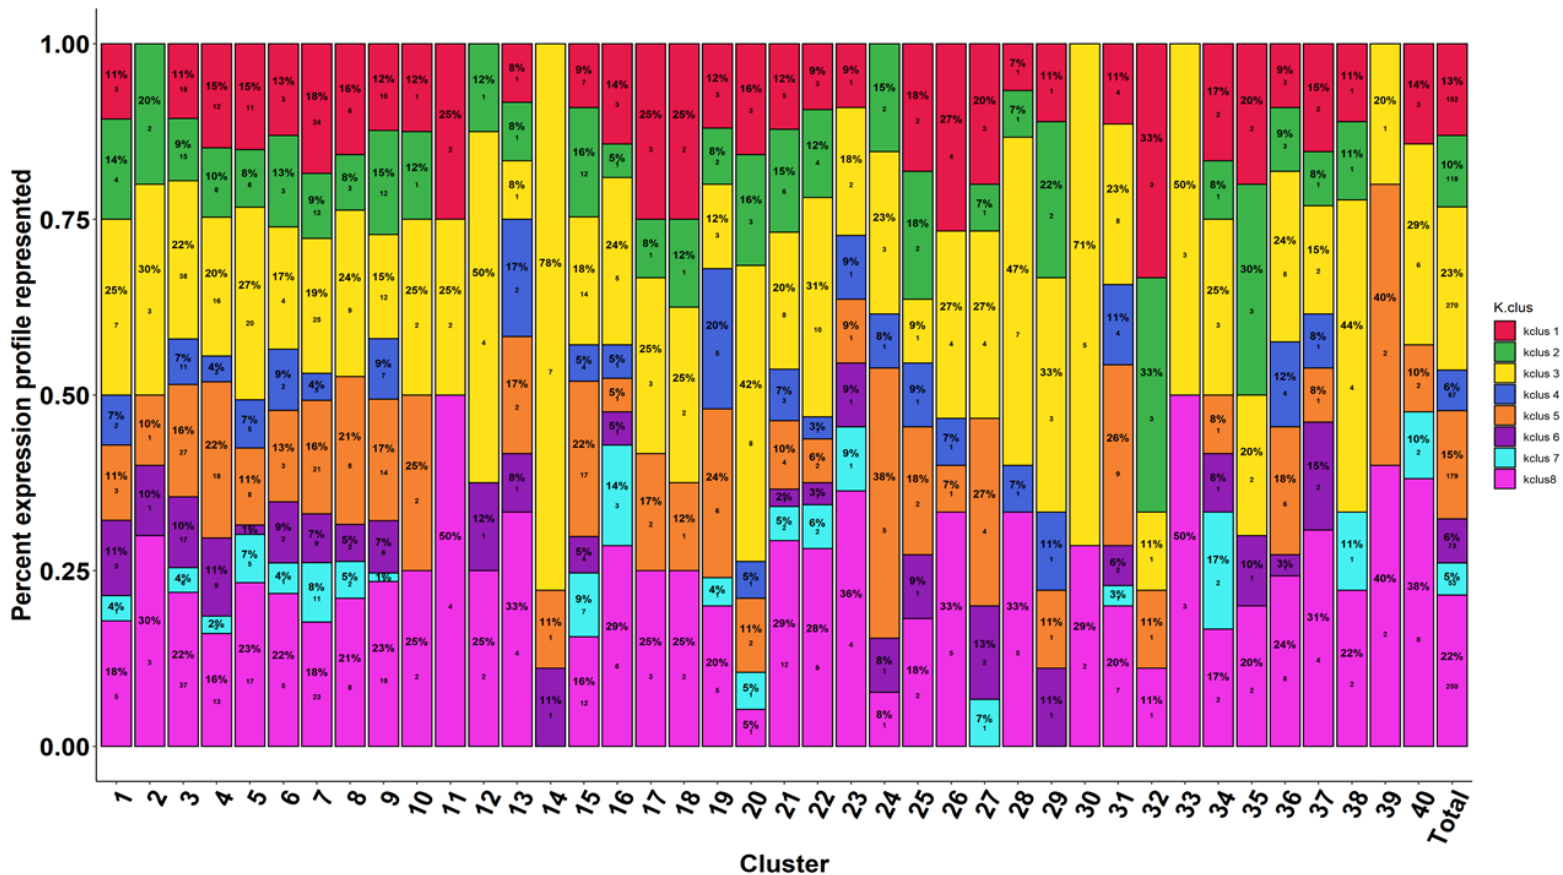

**Distribution of expression profiles per cluster during a conidial germination timecourse.** RNAseq data were obtained from Wang et. al., 2019. The expression value of each gene was standardized to have a mean of 0 and a standard deviation of 2 across the four samples. Genes were partitioned into eight expression clusters using K-means clustering. Each colored portion of each bar denotes the percent of genes in each cluster that belong to the corresponding expression profile.

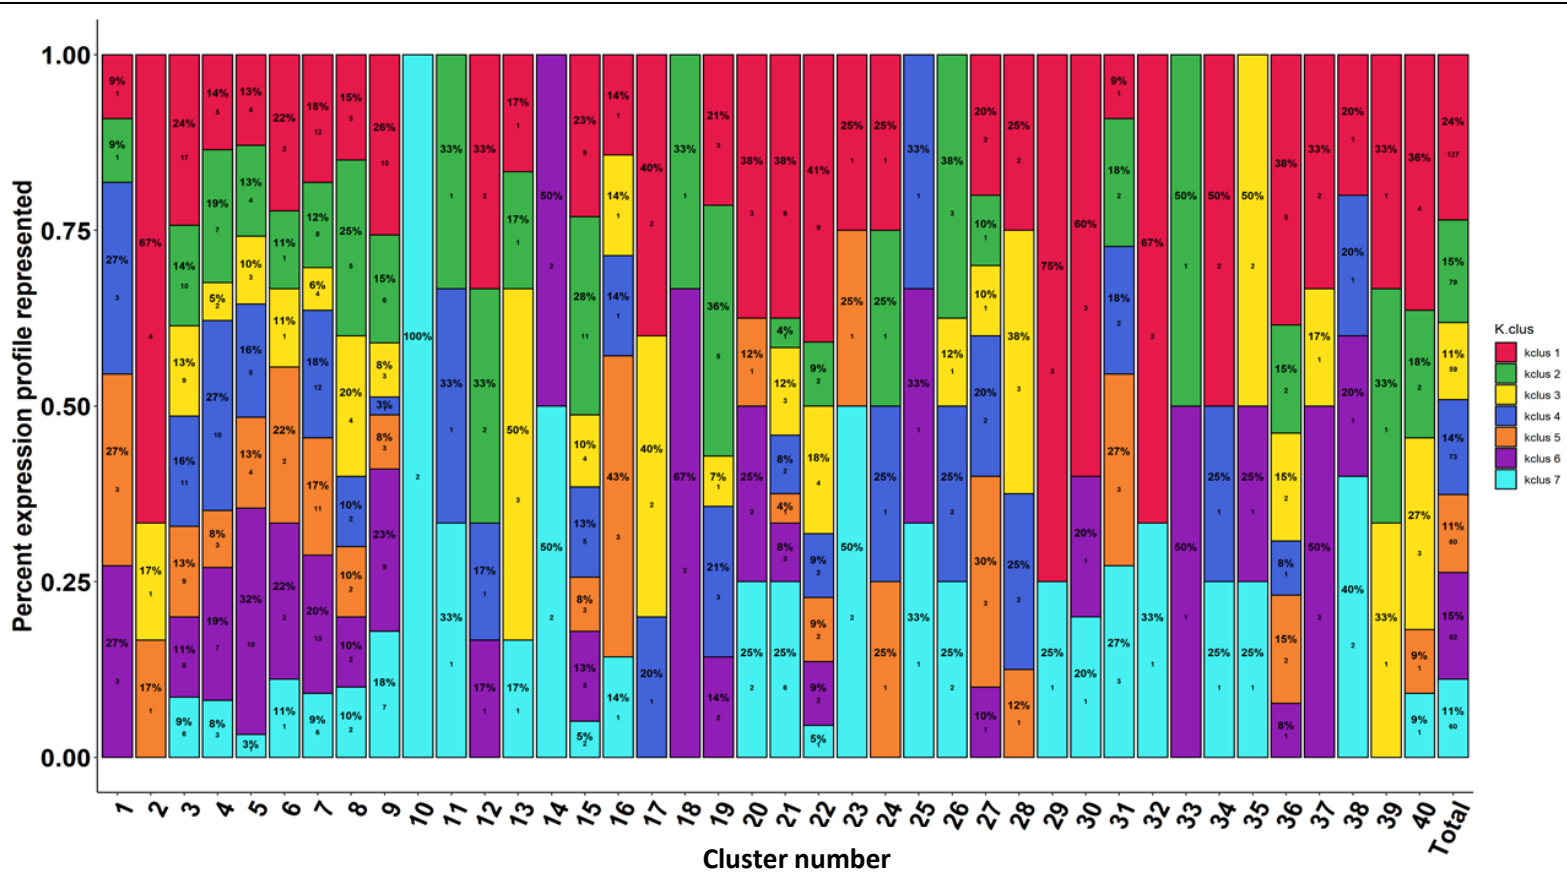

**Distribution of expression profiles per cluster during a conidiation timecourse.**

Microarray data were obtained from Greenwald et. al., 2010. The expression value of each gene was standardized to have a mean of 0 and a standard deviation of 2 across the 10 samples. Genes were partitioned into seven expression clusters using K-means clustering. Each colored portion of each bar denotes the percent of genes in each cluster that belong to the corresponding expression profile.

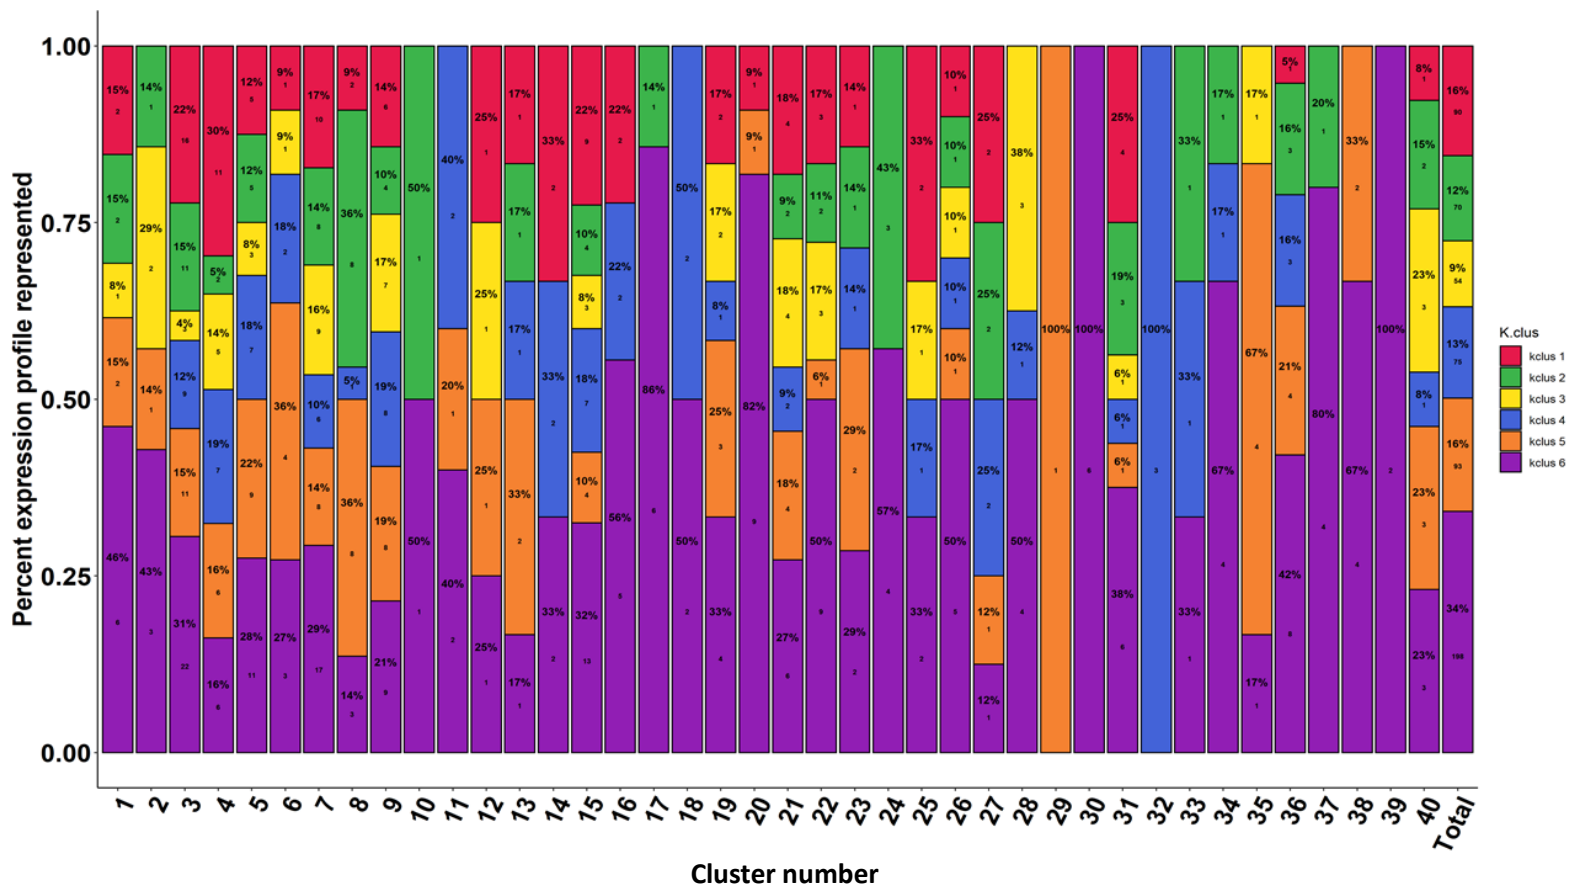

**Distribution of expression profiles per cluster during a colony development timecourse.** Microarray data were obtained from Kasuga et. al., 2008. The expression value of each gene was standardized to have a mean of 0 and a standard deviation of 2 across the six samples. Genes were partitioned into six expression clusters using K-means clustering. Each colored portion of each bar denotes the percent of genes in each cluster that belong to the corresponding expression profile.
